# Supplementary material for: Metal-binding studies of linear rigid-axle [2]pseudorotaxanes with in situ generated anionic metal halide complexes
Source: Royal Society of Chemistry journal article supplement (doi:10.1039/c4ce00789a), 2014-06-04
Supplement: c4ce00789a1.pdf [file c4ce00789a1.pdf]

Supporting Information for

**Metal-Binding Studies of Linear Rigid-Axle [2]Pseudorotaxanes with In-Situ  
Generated Anionic Metal Halide Complexes**

Isurika R. Fernando<sup>a,b</sup>, Yirong Mo<sup>a</sup> and Gellert Mezei<sup>a,\*</sup>

a) Department of Chemistry, Western Michigan University, Kalamazoo, Michigan 49008, USA

b) Current address: Department of Chemistry, Northwestern University, Evanston, Illinois 60208, USA

\* E-mail: gellert.mezei@wmich.edu

**Details of the crystal growing experiments.**

**1**(ZnCl<sub>3</sub>)<sub>2</sub>·H<sub>2</sub>O·0.5CH<sub>3</sub>OH. Dark blue crystals were obtained after two weeks from a solution of ZnCl<sub>2</sub> (0.8 mg, 0.0057 mmol) in CH<sub>3</sub>OH (1.8 mL) layered over a solution of PyBP·[NO<sub>3</sub>]<sub>2</sub> (5 mg, 0.011 mmol) and BN32C8 (5.5 mg, 0.010 mmol) in a 1:1 mixture of CH<sub>3</sub>OH/CHCl<sub>3</sub> (1.8 mL).

**2**(ZnCl<sub>3</sub>)<sub>2</sub>. Dark blue crystals were obtained after two weeks from a solution of ZnCl<sub>2</sub> (0.8 mg, 0.0057 mmol) in CH<sub>3</sub>OH (1.5 mL) layered over a solution of PyBP·[NO<sub>3</sub>]<sub>2</sub> (2.5 mg, 0.0057 mmol) and BN38C10 (3.2 mg, 0.0051 mmol) in a 1:1 mixture of CH<sub>3</sub>OH/CHCl<sub>3</sub> (1.5 mL).

**1**(ZnBr<sub>3</sub>)<sub>2</sub>·H<sub>2</sub>O. Dark blue crystals were obtained after two weeks from a solution of ZnBr<sub>2</sub> (1.3 mg, 0.0057 mmol) in CH<sub>3</sub>OH (1.5 mL) layered over a solution of PyBP·[NO<sub>3</sub>]<sub>2</sub> (2.5 mg, 0.0057 mmol) and BN32C8 (2.8 mg, 0.0050 mmol) in a 1:1 mixture of CH<sub>3</sub>OH/CHCl<sub>3</sub> (1.5 mL).

**2**(ZnBr<sub>3</sub>)<sub>2</sub>. Dark blue crystals were obtained after two weeks from a solution of ZnBr<sub>2</sub> (1.3 mg, 0.0057 mmol) in CH<sub>3</sub>OH (1.8 mL) layered over a solution of PyBP·[NO<sub>3</sub>]<sub>2</sub> (1.3 mg, 0.0028 mmol) and BN38C10 (1.6 mg, 0.0025 mmol) in a 1:1 mixture of CH<sub>3</sub>OH/CHCl<sub>3</sub> (0.75 mL).

**2**·[CdBr<sub>4</sub>]·0.5CHCl<sub>3</sub>·1.5CH<sub>3</sub>OH·0.5H<sub>2</sub>O. Brown-yellow crystals were obtained after two weeks from a solution of CdBr<sub>2</sub> (3.9 mg, 0.0114 mmol) in CH<sub>3</sub>OH (1.5 mL) layered over a 1:1 mixture of PyBP·[NO<sub>3</sub>]<sub>2</sub> (2.5 mg, 0.0057 mmol) and BN38C10 (3.2 mg, 0.0051 mmol) in a 1:1 mixture of CH<sub>3</sub>OH/CHCl<sub>3</sub> (1.5 mL).

**3**·[CdBr<sub>4</sub>]. Dark maroon-red crystals were obtained after two weeks from a solution of CdBr<sub>2</sub> (3.1 mg, 0.0091 mmol) in CH<sub>3</sub>OH (1.5 mL) layered over a 1:1 mixture of PyBP·[NO<sub>3</sub>]<sub>2</sub> (2.0 mg, 0.0046 mmol) and BPP34C10 (2.0 mg, 0.0037 mmol) in a 1:1 mixture of CH<sub>3</sub>OH/CHCl<sub>3</sub> (1.5 mL).

**3·[CdI<sub>4</sub>].** Dark maroon-red crystals were obtained after two weeks from a solution of CdI<sub>2</sub> (4.2 mg, 0.0114 mmol) in CH<sub>3</sub>OH (1.5 mL) layered over a solution of PyBP·[NO<sub>3</sub>]<sub>2</sub> (2.5 mg, 0.0057 mmol) and BPP34C10 (2.5 mg, 0.0047 mmol) in CH<sub>3</sub>OH (1.5 mL).

**1·[Hg<sub>2</sub>Br<sub>6</sub>].** A solution of HgBr<sub>2</sub> (4.2 mg, 0.0115 mmol) in CH<sub>3</sub>OH (1.5 mL) was layered over a solution of PyBP·[NO<sub>3</sub>]<sub>2</sub> (2.5 mg, 0.0057 mmol) and BN32C8 (2.8mg, 0.0057 mmol) in a 1:1 mixture of CH<sub>3</sub>OH/CHCl<sub>3</sub> (1.5 mL). Very small, greenish-blue crystals formed after one week (not suitable for X-ray diffraction). Upon standing, the greenish-blue crystals slowly re-dissolved, while larger (X-ray quality), dark blue/red dichroic crystals grew over the next two weeks.

**2(Hg<sub>2</sub>Br<sub>6</sub>)<sub>2</sub>·PyBP·CH<sub>3</sub>OH.** Dark violet/yellow dichroic crystals were obtained after three weeks from a solution of HgBr<sub>2</sub> (4.2 mg, 0.0114 mmol) in CH<sub>3</sub>OH (1.5 mL) layered over a solution of PyBP·[NO<sub>3</sub>]<sub>2</sub> (2.5 mg, 0.0057 mmol) and BN38C10 (3.2mg, 0.0051 mmol) in a 1:1 mixture of CH<sub>3</sub>OH/CHCl<sub>3</sub> (1.5 mL).

**1·[Hg<sub>2</sub>I<sub>6</sub>].** A 2:3 mixture of CH<sub>3</sub>OH and CHCl<sub>3</sub> was layered over a solution of PyBP·[NO<sub>3</sub>]<sub>2</sub> (2.0 mg, 0.0046 mmol) and BN32C8 (2.8 mg, 0.0057 mmol) in a 1:1 mixture of CH<sub>3</sub>OH/CHCl<sub>3</sub> (1.5 mL), followed by a third layer of HgBr<sub>2</sub> (4.2 mg, 0.0092 mmol) in CH<sub>3</sub>OH (1.5 mL). No crystals formed after one week in the freezer (−20 °C). Upon warming to room temperature, dark blue/yellow dichroic, X-ray quality crystals were obtained after two weeks.

**2·[Hg<sub>2</sub>I<sub>6</sub>]·3CH<sub>3</sub>OH.** A 2:3 mixture of CH<sub>3</sub>OH and CHCl<sub>3</sub> was layered over a solution of PyBP·[NO<sub>3</sub>]<sub>2</sub> (2.5 mg, 0.0057 mmol) and BN38C10 (3.2mg, 0.0051 mmol) in a 1:1 mixture of CH<sub>3</sub>OH/CHCl<sub>3</sub> (1.5 mL), followed by a third layer of HgI<sub>2</sub> (5.2 mg, 0.0114 mmol) in CH<sub>3</sub>OH (1.5 mL). The vial was kept in the freezer at −20 °C for one week. White needles crystallized on the bottom of the vial. Upon warming to room temperature (30-40 min), the white crystalline material re-dissolved. After two weeks at room temperature, dark green/brown dichroic, X-ray quality crystals were obtained.

**[PyBP][CdI<sub>4</sub>].** Orange-red crystals were obtained after two weeks from slow diffusion of a three-layer solution setup. 0.8 mL CH<sub>3</sub>OH/CHCl<sub>3</sub> (2:3) solvent mixture was layered over a solution of PyBP·[NO<sub>3</sub>]<sub>2</sub> (2.0 mg, 0.0057 mmol) and BN38C10 (2.6 mg, 0.0040 mmol) in 1.5 mL CHCl<sub>3</sub>/CH<sub>3</sub>OH (1:1), and a third layer of CdI<sub>2</sub> (3.6 mg, 0.0091 mmol) in CH<sub>3</sub>OH (1.5 mL) was added on top.

**[PyBP](ZnI<sub>3</sub>)<sub>2</sub>·3CH<sub>3</sub>OH.** Dark red crystals were obtained after five days from a solution of ZnI<sub>2</sub> (3.6 mg, 0.0113 mmol) and KI (1.9 mg, 0.0113 mmol) in CH<sub>3</sub>OH (1.5 mL) layered over a solution of PyBP·[NO<sub>3</sub>]<sub>2</sub> (2.5 mg, 0.0057 mmol) and BPP34C10 (3.1 mg, 0.0057 mmol) in CH<sub>3</sub>OH (1.5 mL).

**Table S1.** Products of the crystal growing setups with MX<sub>2</sub>/KX.

| MX <sub>2</sub> /KX    | [2]Pseudorotaxane             |                                           |                              |                                           |                             |                                                             |
|------------------------|-------------------------------|-------------------------------------------|------------------------------|-------------------------------------------|-----------------------------|-------------------------------------------------------------|
|                        | [PyBP/BPP34C10] <sup>2+</sup> |                                           | [PyBP/BN38C10] <sup>2+</sup> |                                           | [PyBP/BN32C8] <sup>2+</sup> |                                                             |
|                        | solution                      | precipitate/<br>crystal                   | solution                     | precipitate/<br>crystal                   | solution                    | precipitate/crystal                                         |
| ZnCl <sub>2</sub> /KCl | Colorless solution            | Light yellow precipitate                  | Light yellow solution        | Light yellow precipitate                  | Light yellow solution       | Colorless crystals and light yellow precipitate             |
| ZnBr <sub>2</sub> /KBr | Colorless solution            | Light brown crystalline solid             | Colorless solution           | Light yellowish-green solid               | Light blue solution         | Colorless crystals and light yellow precipitate             |
| ZnI <sub>2</sub> /KI   | Light yellow solution         | Red crystals                              | Light yellow solution        | Red crystalline aggregates                | Light yellow solution       | Dark blue precipitate                                       |
| CdCl <sub>2</sub> /KCl | Colorless solution            | Light yellowish-brown precipitate         | Colorless solution           | Light yellowish-brown solid               | Colorless solution          | Light yellowish brown solid                                 |
| CdBr <sub>2</sub> /KBr | Colorless solution            | Light yellow precipitate                  | Colorless solution           | Light yellow precipitate                  | Colorless solution          | Light yellow precipitate                                    |
| CdI <sub>2</sub> /KI   | Bright yellow solution        | Yellow crystals                           | Bright yellow solution       | Yellow crystals                           | Bright yellow solution      | Yellow crystals                                             |
| HgCl <sub>2</sub> /KCl | Light yellow solution         | Light golden-brown needle shaped crystals | Light yellow solution        | Light golden-brown needle shaped crystals | Light yellow solution       | Light golden-brown needle shaped crystals                   |
| HgBr <sub>2</sub> /KBr | Colorless solution            | Light yellow solid                        | Colorless solution           | Light yellow solid                        | Colorless solution          | Light yellow solid                                          |
| HgI <sub>2</sub> /KI   | Light yellow solution         | Maroon-red precipitate                    | Light yellow solution        | Maroon-red precipitate                    | Light yellow solution       | Three different solid aggregates, orange, red and dark-blue |

**Table S2.** Identity of the solid crystallization products with  $\text{MX}_2/\text{KX}$ , based on  $^1\text{H}$  NMR analysis

| $\text{MX}_2/\text{KX}$    | [2]Pseudorotaxane                    |                                            |                                           |
|----------------------------|--------------------------------------|--------------------------------------------|-------------------------------------------|
|                            | $[\text{PyBP}/\text{BPP34C10}]^{2+}$ | $[\text{PyBP}/\text{BN38C10}]^{2+}$        | $[\text{PyBP}/\text{BN32C8}]^{2+}$        |
| $\text{ZnCl}_2/\text{KCl}$ | $[\text{PyBP}][\text{NO}_3]_2$       | $[\text{PyBP}][\text{NO}_3]_2$             | $[\text{PyBP}][\text{NO}_3]_2$ and BN32C8 |
| $\text{ZnBr}_2/\text{KBr}$ | $[\text{PyBP}][\text{NO}_3]_2$       | $[\text{PyBP}][\text{NO}_3]_2$             | $[\text{PyBP}][\text{NO}_3]_2$ and BN32C8 |
| $\text{ZnI}_2/\text{KI}$   | $[\text{PyBP}][\text{NO}_3]_2$       | $[\text{PyBP}][\text{NO}_3]_2$             | $[\text{PyBP}][\text{NO}_3]_2$ and BN32C8 |
| $\text{CdCl}_2/\text{KCl}$ | $[\text{PyBP}][\text{NO}_3]_2$       | $[\text{PyBP}][\text{NO}_3]_2$             | $[\text{PyBP}][\text{NO}_3]_2$ and BN32C8 |
| $\text{CdBr}_2/\text{KBr}$ | $[\text{PyBP}][\text{NO}_3]_2$       | $[\text{PyBP}][\text{NO}_3]_2$ and BN38C10 | $[\text{PyBP}][\text{NO}_3]_2$ and BN32C8 |
| $\text{CdI}_2/\text{KI}$   | $[\text{PyBP}][\text{NO}_3]_2$       | $[\text{PyBP}][\text{NO}_3]_2$ and BN38C10 | $[\text{PyBP}][\text{NO}_3]_2$ and BN32C8 |
| $\text{HgCl}_2/\text{KCl}$ | $[\text{PyBP}][\text{NO}_3]_2$       | $[\text{PyBP}][\text{NO}_3]_2$             | $[\text{PyBP}][\text{NO}_3]_2$ and BN32C8 |
| $\text{HgBr}_2/\text{KBr}$ | $[\text{PyBP}][\text{NO}_3]_2$       | $[\text{PyBP}][\text{NO}_3]_2$             | $[\text{PyBP}][\text{NO}_3]_2$ and BN32C8 |
| $\text{HgI}_2/\text{KI}$   | $[\text{PyBP}][\text{NO}_3]_2$       | $[\text{PyBP}][\text{NO}_3]_2$             | $[\text{PyBP}][\text{NO}_3]_2$ and BN32C8 |

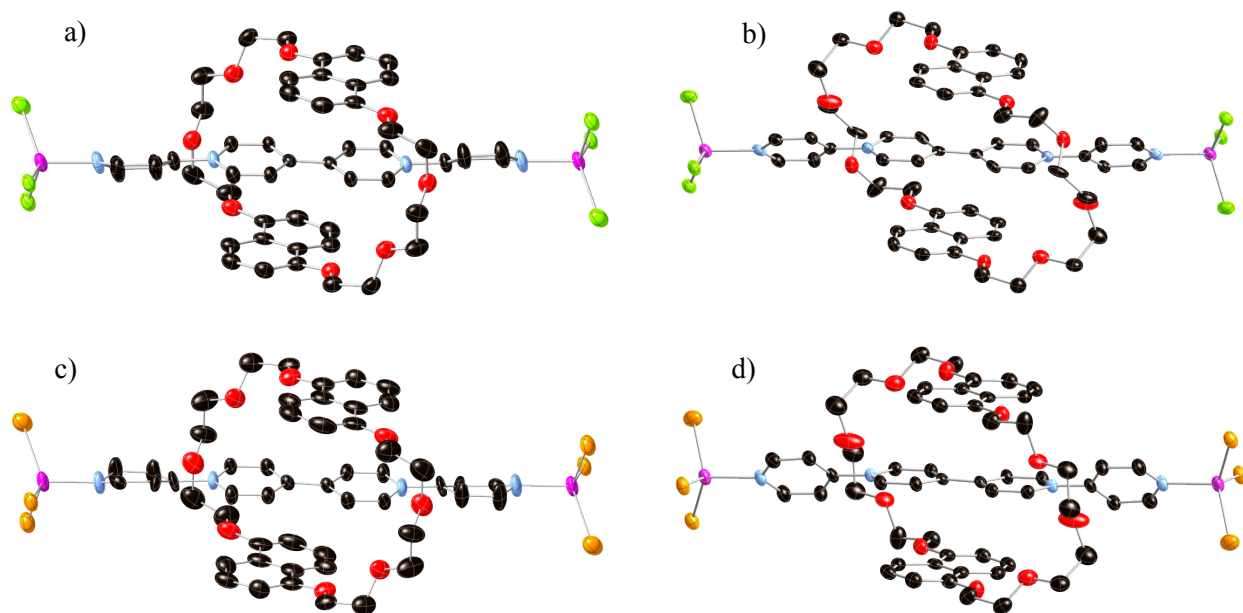

**Figure S1.** Thermal ellipsoid plots (50%) for a)  $1(\text{ZnCl}_3)_2$ , b)  $2(\text{ZnCl}_3)_2$ , c)  $1(\text{ZnBr}_3)_2 \cdot \text{CH}_3\text{OH}$  and d)  $2(\text{ZnBr}_3)_2$ . H-atoms and solvent molecules are omitted for clarity. Color code: Zn—magenta; Cl—lime green; Br—orange; O—red; N—light blue; C—black.



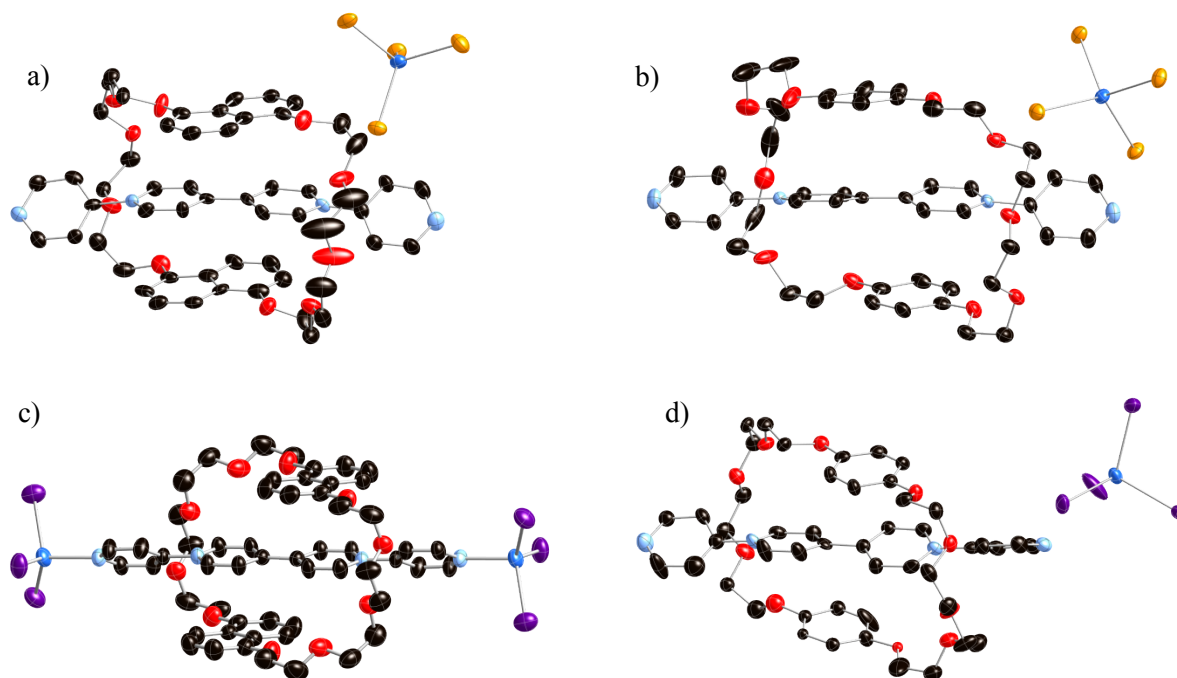

**Figure S2.** Thermal ellipsoid plots (50%) for **2**·[CdBr<sub>4</sub>]·0.5CHCl<sub>3</sub>·1.5CH<sub>3</sub>OH·0.5H<sub>2</sub>O, **b**) **3**·[CdBr<sub>4</sub>], **c**) **2**(CdI<sub>3</sub>)<sub>2</sub>·2CH<sub>3</sub>OH and **d**) **3**·[CdI<sub>4</sub>]. H-atoms and solvent molecules are omitted for clarity. Color code: Cd–blue; Br–orange; I–violet; O–red; N–light blue; C–black.

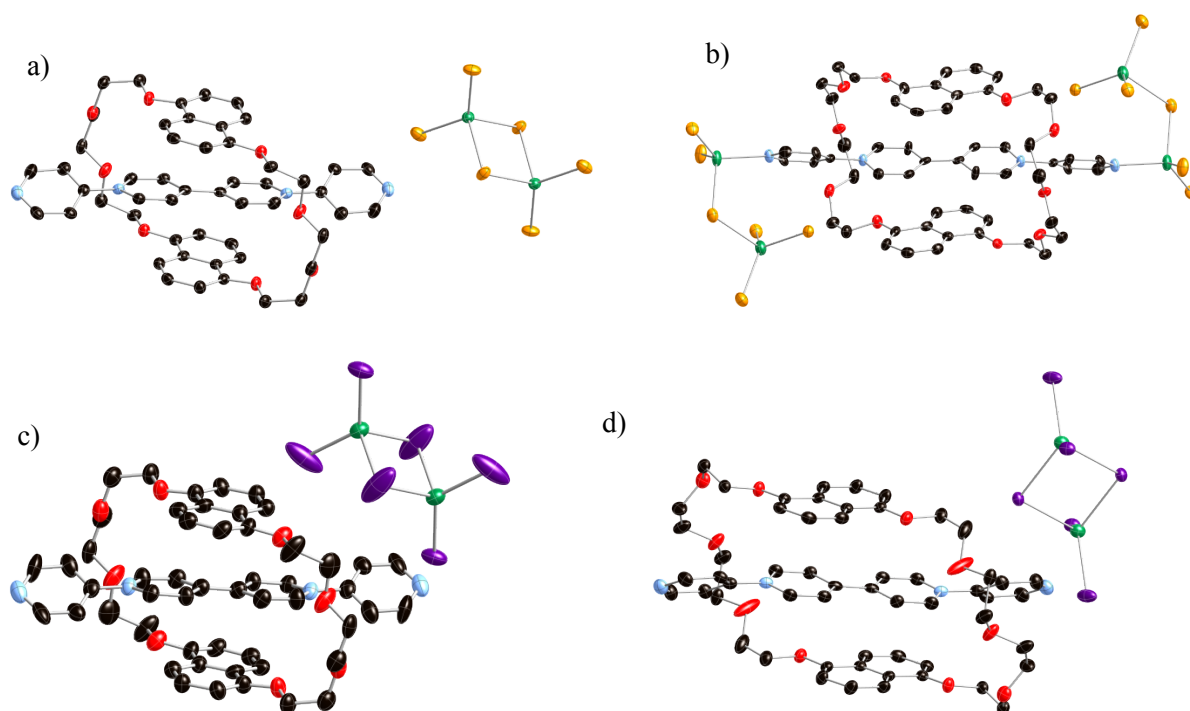

**Figure S3.** Thermal ellipsoid plots (50%) for **a**) **1**·[Hg<sub>2</sub>Br<sub>6</sub>], **b**) **2**(Hg<sub>2</sub>Br<sub>6</sub>)<sub>2</sub>·PyBP·CH<sub>3</sub>OH, **c**) **1**·[Hg<sub>2</sub>I<sub>6</sub>] and **d**) **2**·[Hg<sub>2</sub>I<sub>6</sub>]·3CH<sub>3</sub>OH. H-atoms and solvent molecules are omitted for clarity. Color code: Hg–green; Br–orange; I–violet; O–red; N–light blue; C–black.

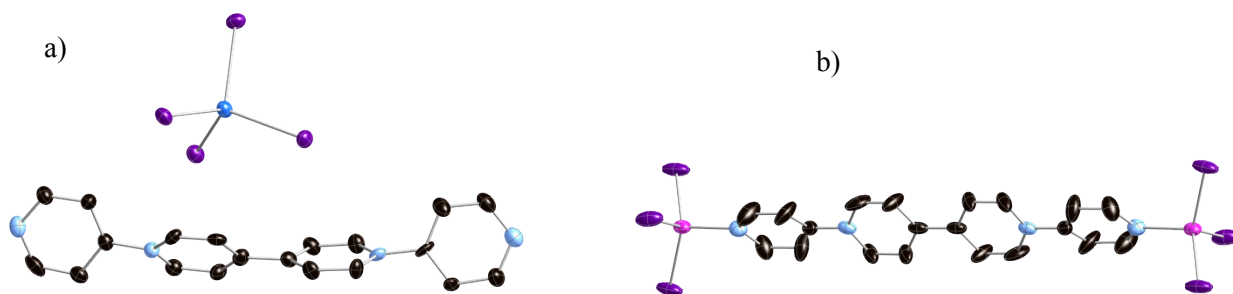

**Figure S4.** Thermal ellipsoid plots (50%) for a)  $\text{PyBP} \cdot [\text{CdI}_4]$  and b)  $\text{PyBP}(\text{ZnI}_3)_2 \cdot 3\text{CH}_3\text{OH}$ . H-atoms and solvent molecules are omitted for clarity. Color code: Cd–blue; Zn–magenta; I–violet; N–light blue; C–black; H–pink.

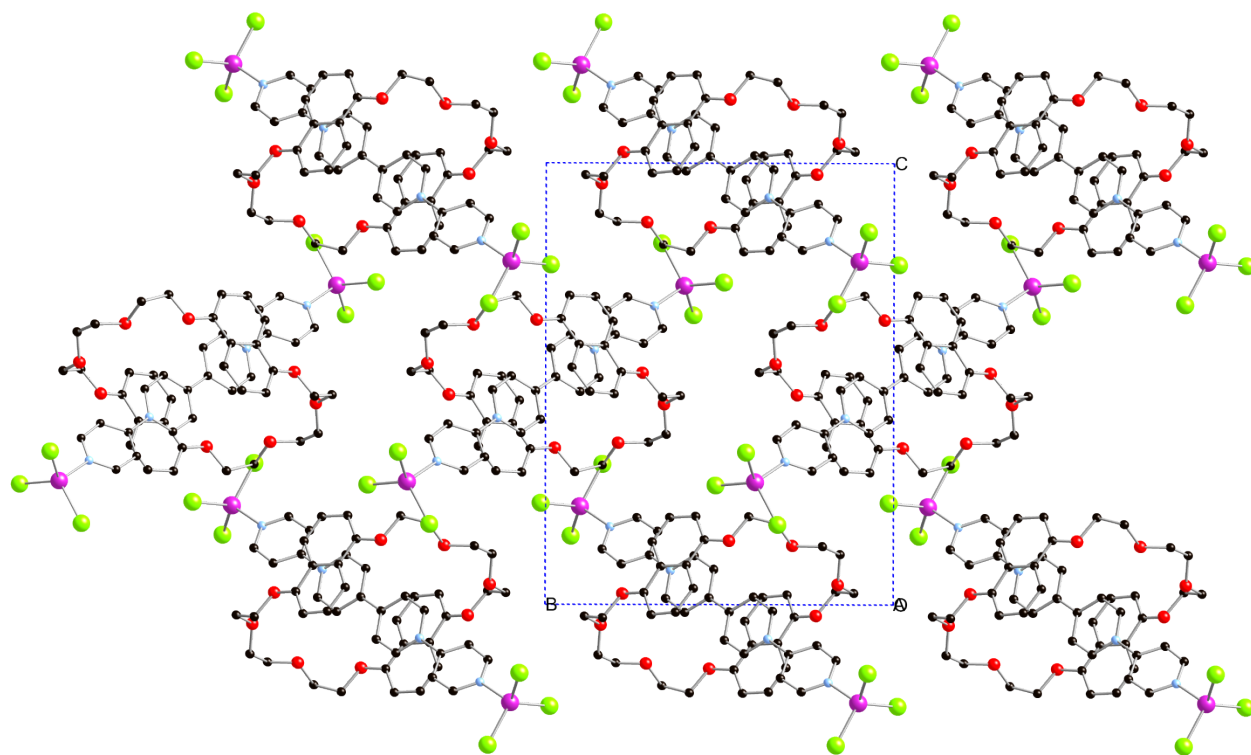

**Figure S5.** Packing diagram of  $1(\text{ZnCl}_3)_2$ . H-atoms are omitted for clarity. Color code: Zn–magenta; Cl–lime green; O–red; N–light blue; C–black.

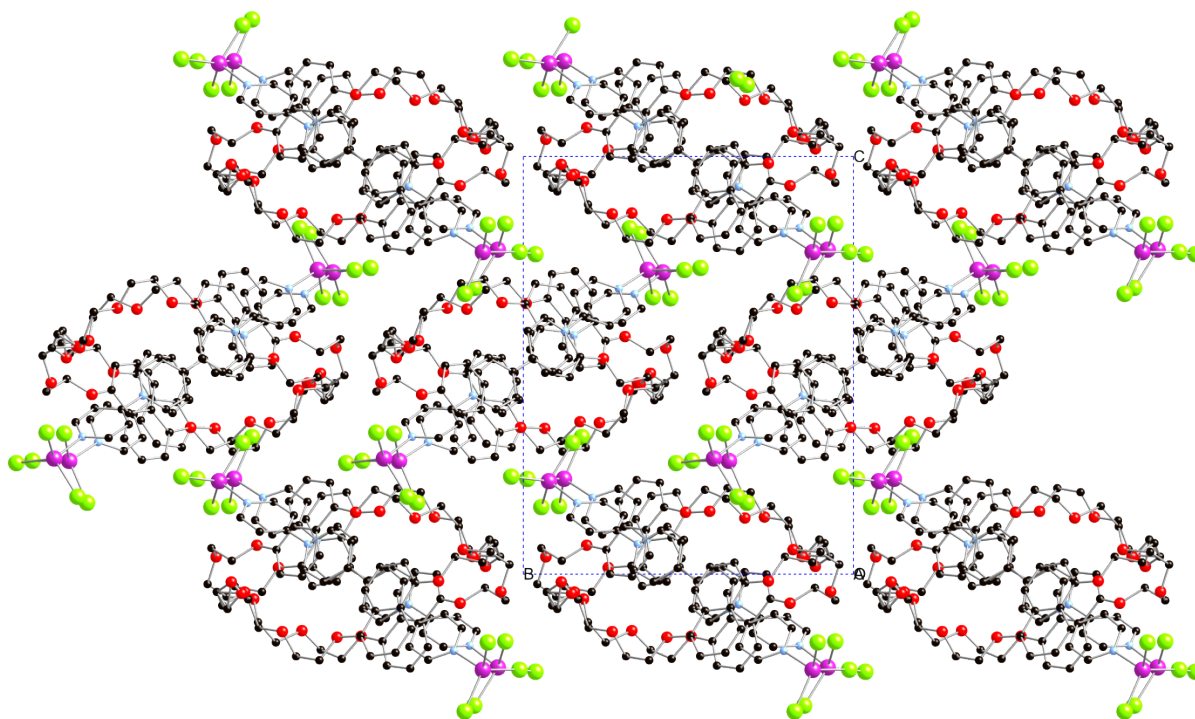

**Figure S6.** Packing diagram of  $2(\text{ZnCl}_3)_2$ . H-atoms are omitted for clarity. Color code: Zn–magenta; Cl–lime green; O–red; N–light blue; C–black.

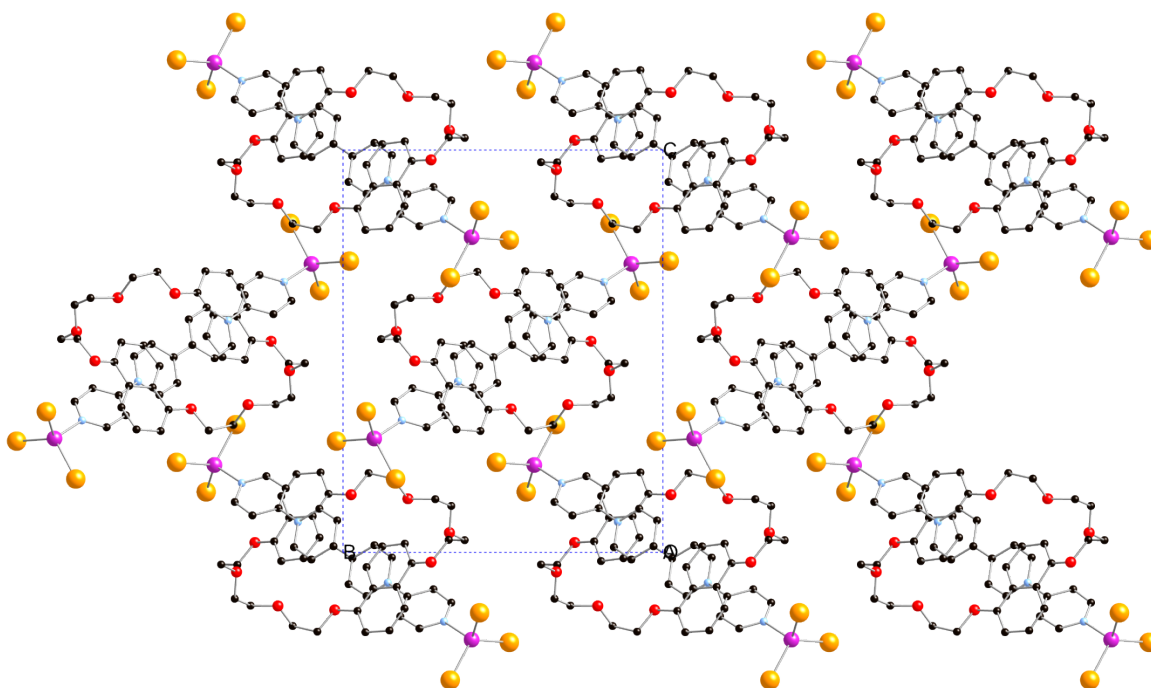

**Figure S7.** Packing diagram of  $1(\text{ZnBr}_3)_2 \cdot \text{CH}_3\text{OH}$ . H-atoms and solvent molecules are omitted for clarity. Color code: Zn–magenta; Br–orange; O–red; N–light blue; C–black.

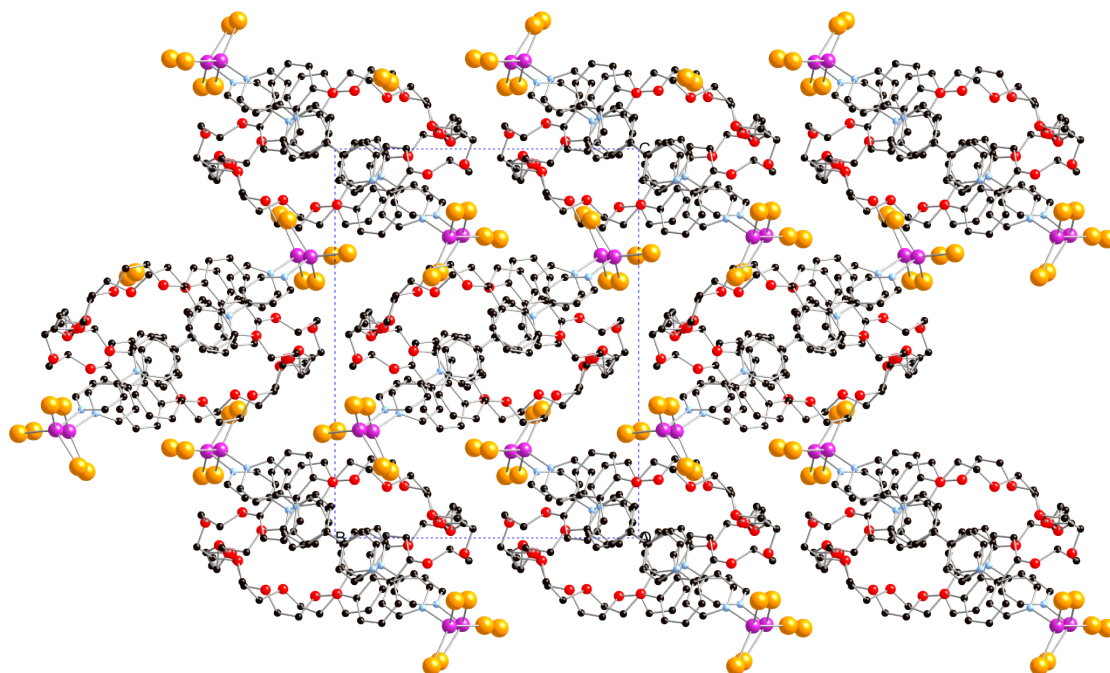

**Figure S8.** Packing diagram of  $2(\text{ZnBr}_3)_2$ . H-atoms are omitted for clarity. Color code: Zn–magenta; Br–orange; O–red; N–light blue; C–black.

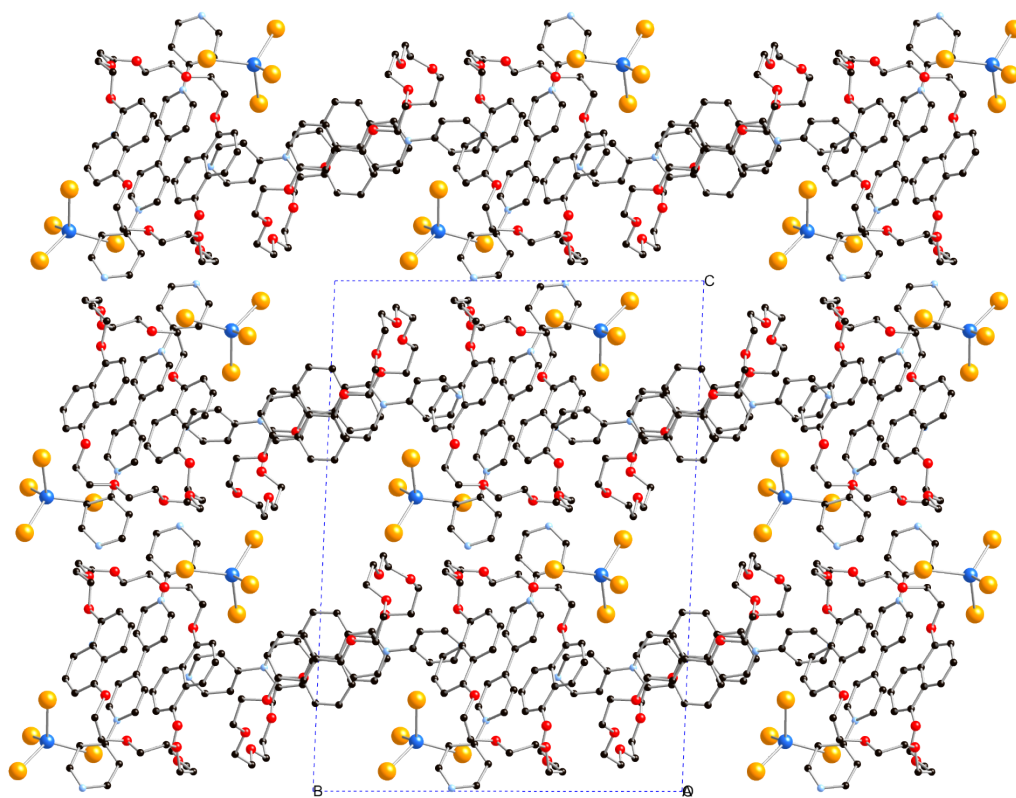

**Figure S9.** Packing diagram of  $2 \cdot [\text{CdBr}_4] \cdot 0.5\text{CHCl}_3 \cdot 1.5\text{CH}_3\text{OH} \cdot 0.5\text{H}_2\text{O}$ . H-atoms and solvent molecules are omitted for clarity. Color code: Cd–blue; Br–orange; O–red; N–light blue; C–black.



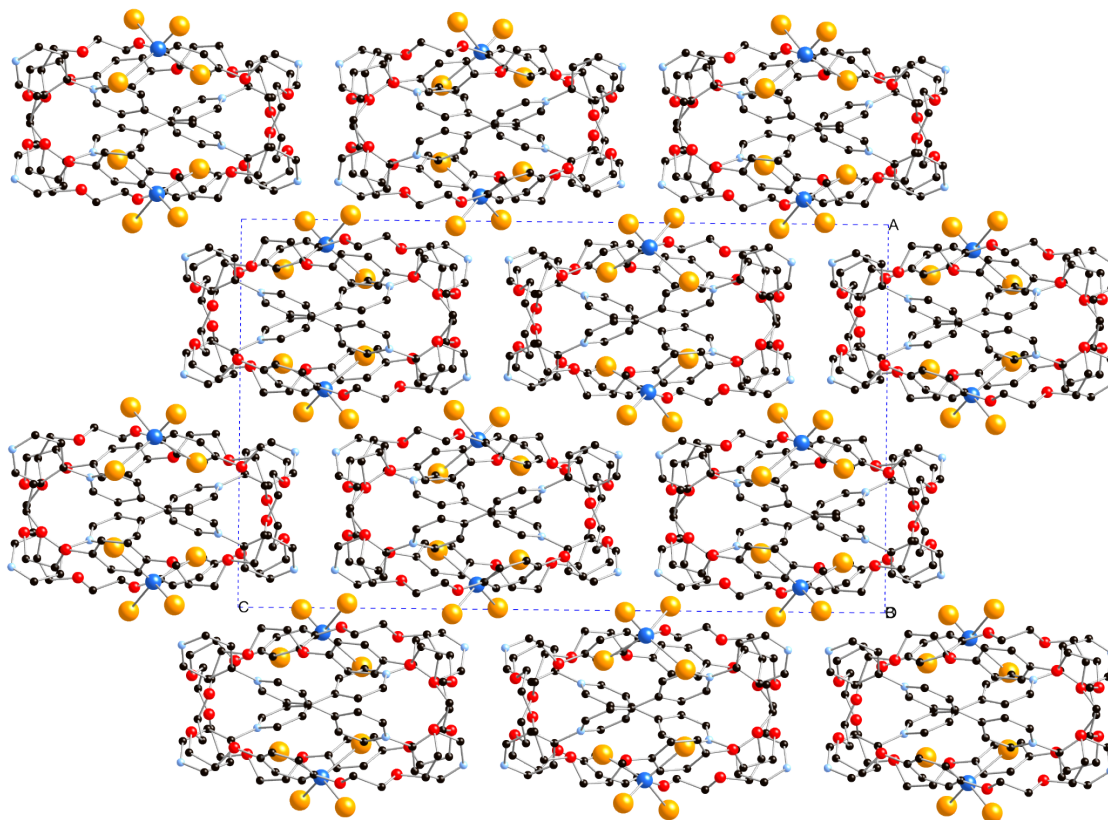

**Figure S10.** Packing diagram of  $3 \cdot [\text{CdBr}_4]$ . H-atoms are omitted for clarity. Color code: Cd–blue; Br–orange; O–red; N–light blue; C–black.

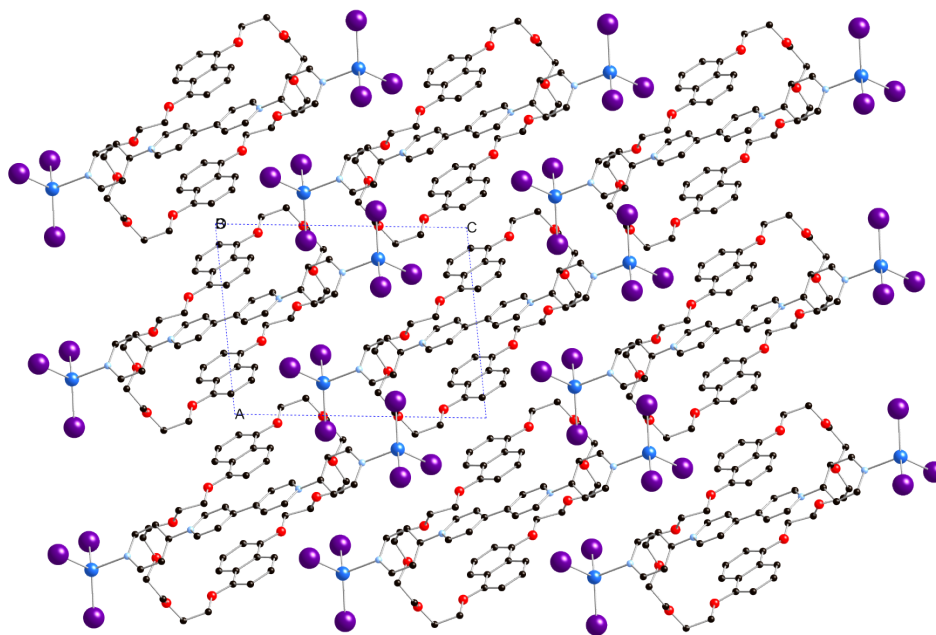

**Figure S11.** Packing diagram of  $2(\text{CdI}_3)_2 \cdot 2\text{CH}_3\text{OH}$ . H-atoms and solvent molecules are omitted for clarity. Color code: Cd–blue; I–violet; O–red; N–light blue; C–black.

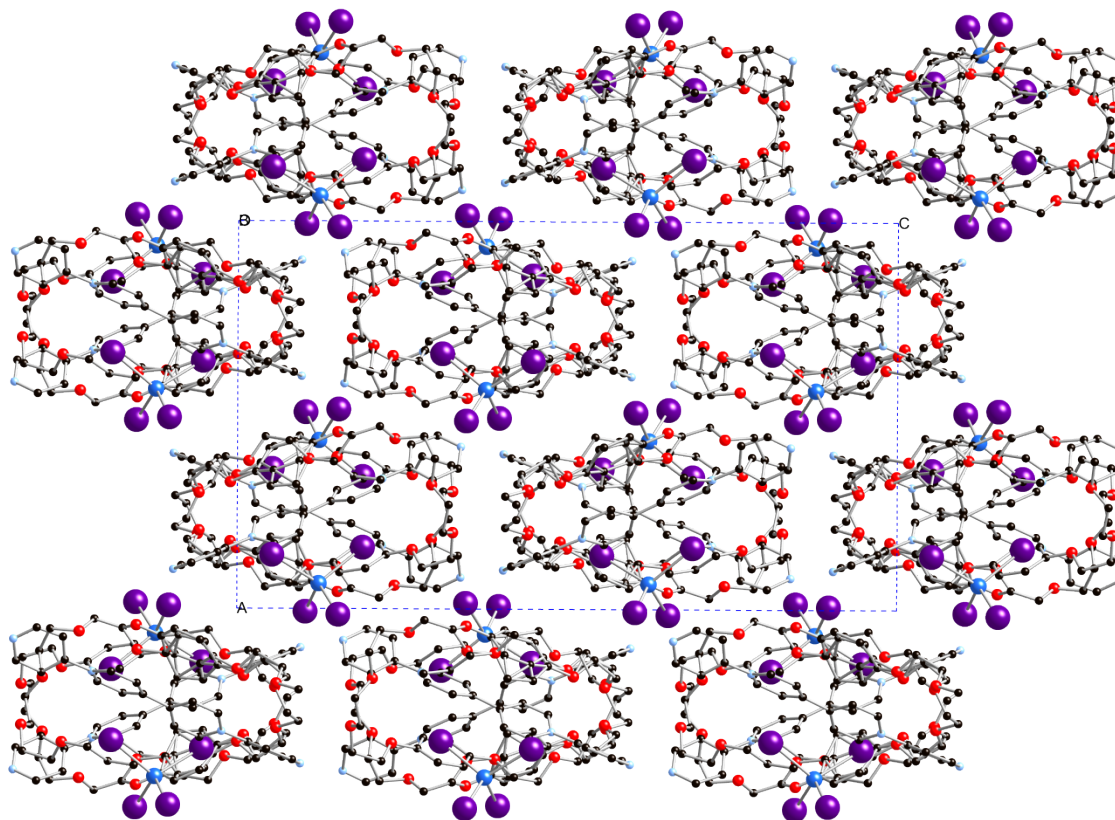

**Figure S12.** Packing diagram of  $3 \cdot [\text{CdI}_4]$ . H-atoms are omitted for clarity. Color code: Cd–blue; I–violet; O–red; N–light blue; C–black.

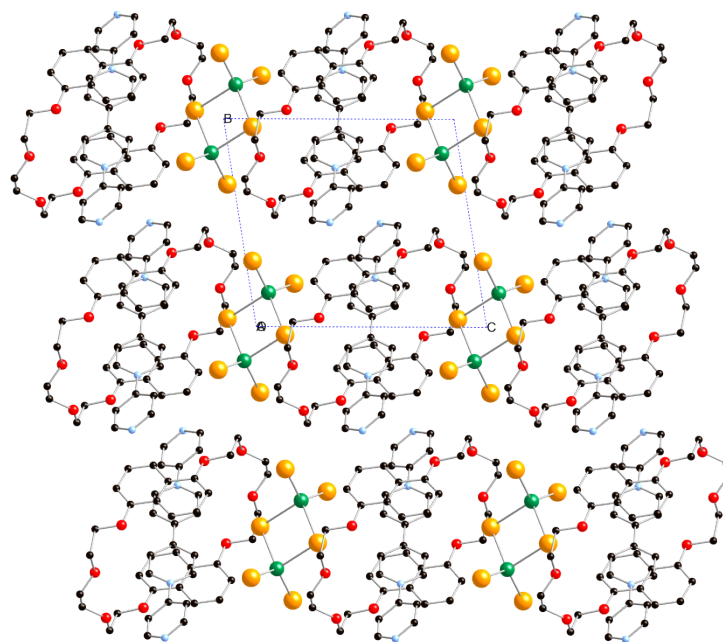

**Figure S13.** Packing diagram of  $1 \cdot [\text{Hg}_2\text{Br}_6]$ . H-atoms are omitted for clarity. Color code: Hg–green; Br–orange; O–red; N–light blue; C–black.

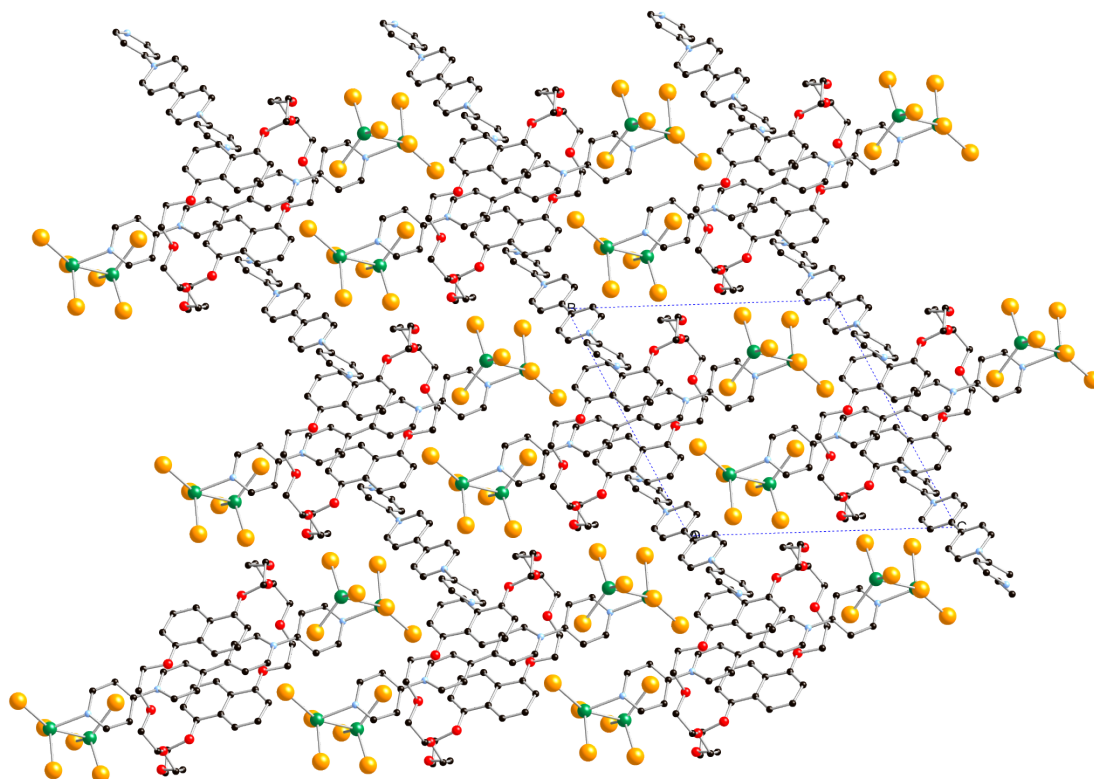

**Figure S14.** Packing diagram of  $2(\text{Hg}_2\text{Br}_6)_2 \cdot \text{PyBP} \cdot \text{CH}_3\text{OH}$ . H-atoms and solvent molecules are omitted for clarity. Color code: Hg—green; Br—orange; O—red; N—light blue; C—black.

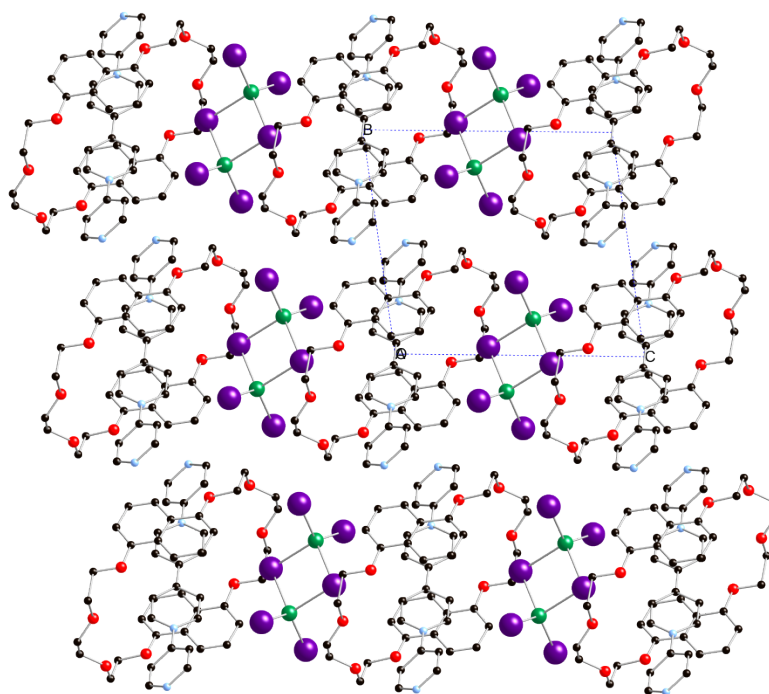

**Figure S15.** Packing diagram of  $1 \cdot [\text{Hg}_2\text{I}_6]$ . H-atoms are omitted for clarity. Color code: Hg—green; I—violet; O—red; N—light blue; C—black.

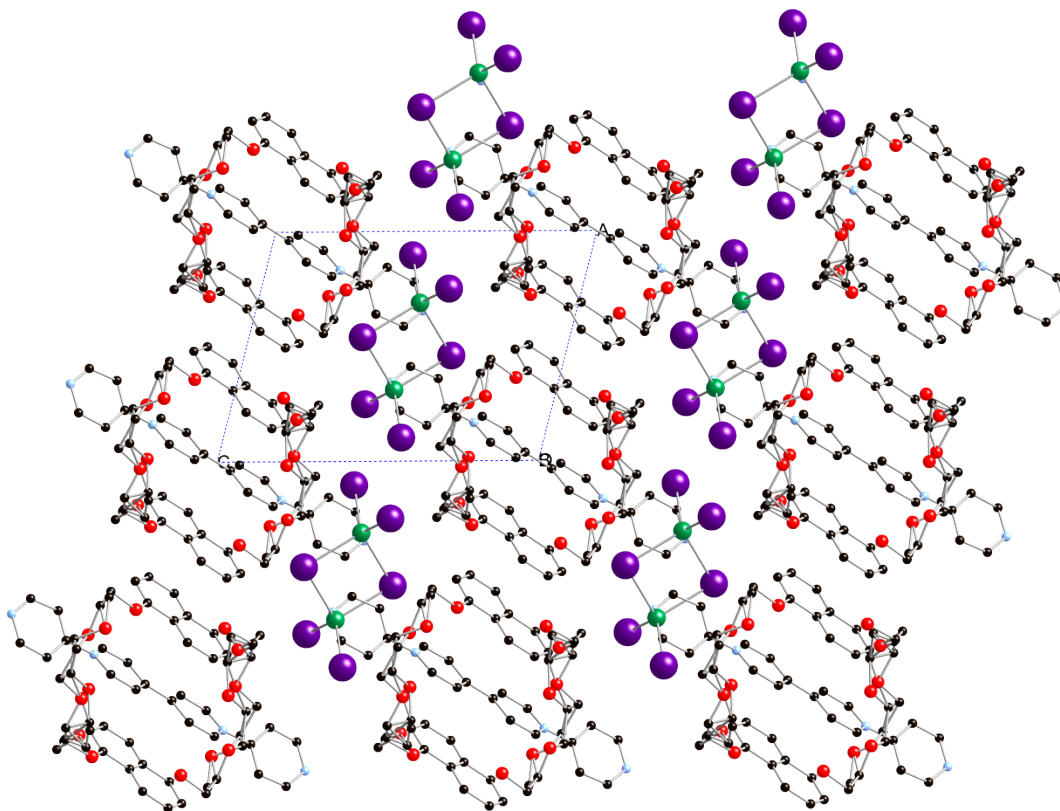

**Figure S16.** Packing diagram of  $2 \cdot [\text{Hg}_2\text{I}_6] \cdot 3\text{CH}_3\text{OH}$ . H-atoms and solvent molecules are omitted for clarity. Color code: Hg—green; I—violet; O—red; N—light blue; C—black.

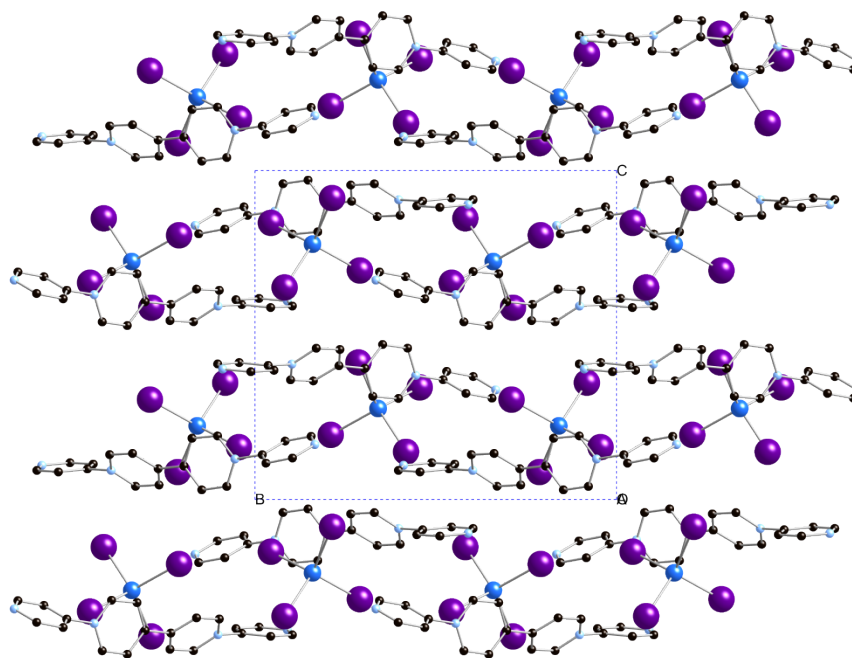

**Figure S17.** Packing diagram of  $\text{PyBP} \cdot [\text{CdI}_4]$ . H-atoms are omitted for clarity. Color code: Cd—blue; I—violet; N—light blue; C—black.



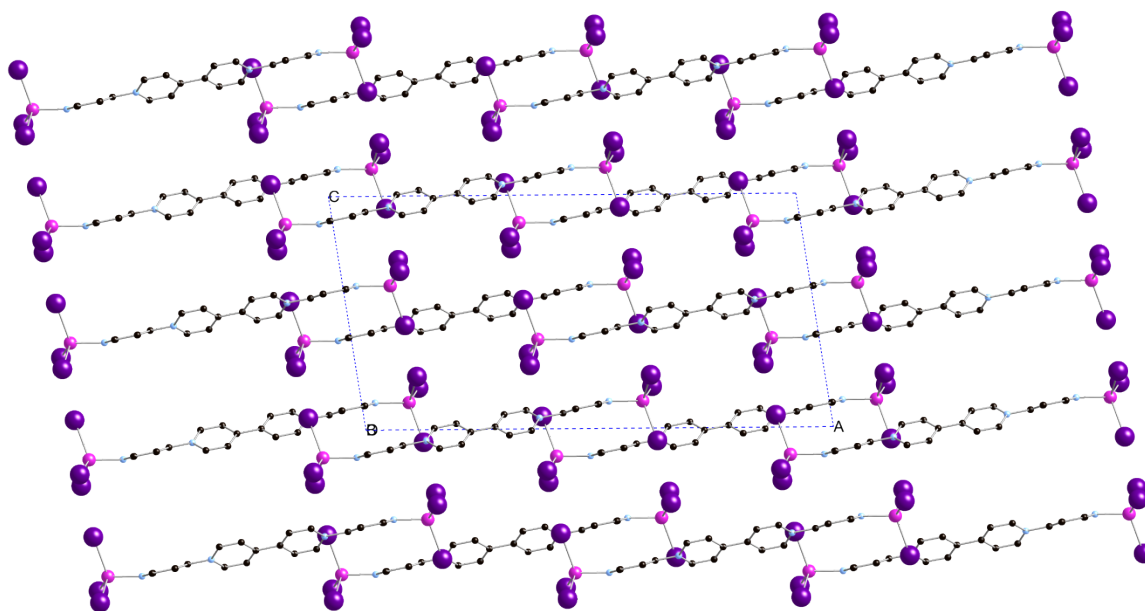

**Figure S18.** Packing diagram of  $\text{PyBP}(\text{ZnI}_3)_2 \cdot 3\text{CH}_3\text{OH}$ . H-atoms and solvent molecules are omitted for clarity. Color code: Zn—magenta; I—violet; N—light blue; C—black.
